# Supplementary material for: Modeling the Effectiveness of Initial Management Strategies for Ductal Carcinoma In Situ
Source: Oxford University Press journal article supplement (doi:10.1093/jnci/djt096), 2013-05-01
Supplement: 1004239_Supplementary_Data.zip [file 1004239_Supplementary_Data.zip]

**Supplementary Figure 1.** Model validation. SEER DCIS breast-cancer specific- and overall survival rates compared to our model results at different ages of diagnosis. **A.** Breast-cancer specific survival at 45 years of age at diagnosis, **B.** Overall survival at 45 years of age at diagnosis, **C.** Breast-cancer specific survival at 60 years of age at diagnosis, **D.** Overall survival at 60 years of age at diagnosis, **E.** Breast-cancer specific survival at 70 years of age at diagnosis, and **F.** Overall survival at 70 years of age at diagnosis.

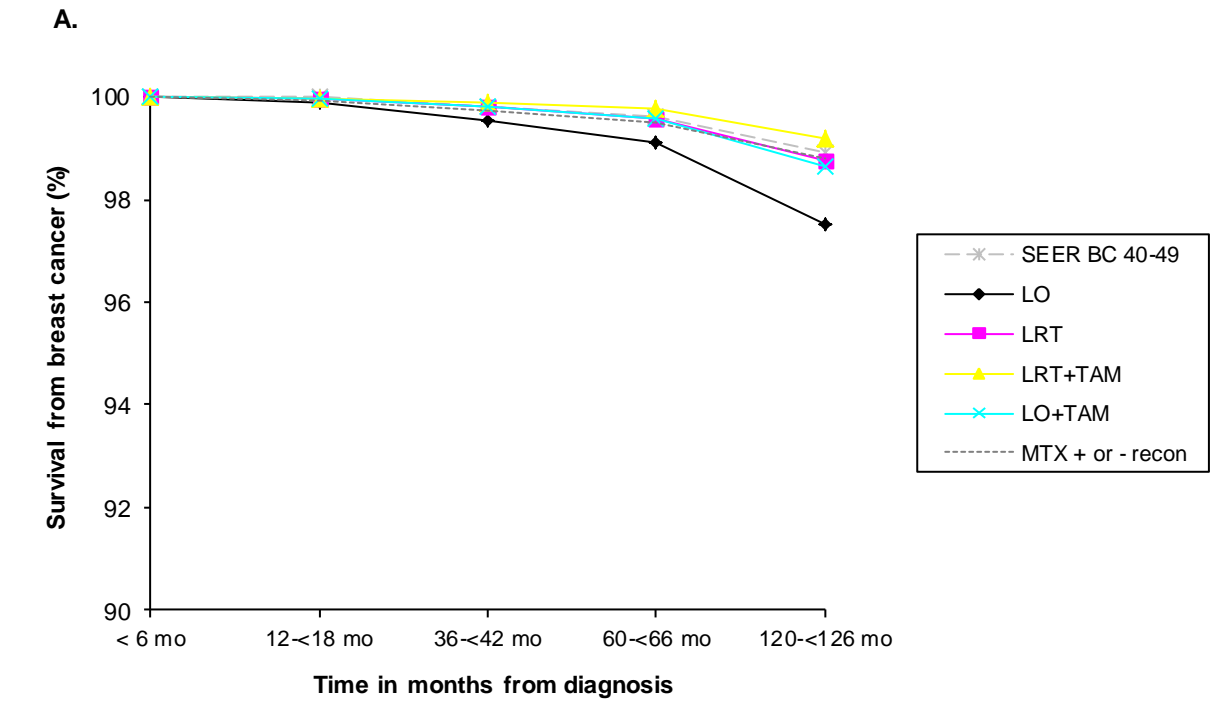

**B.**

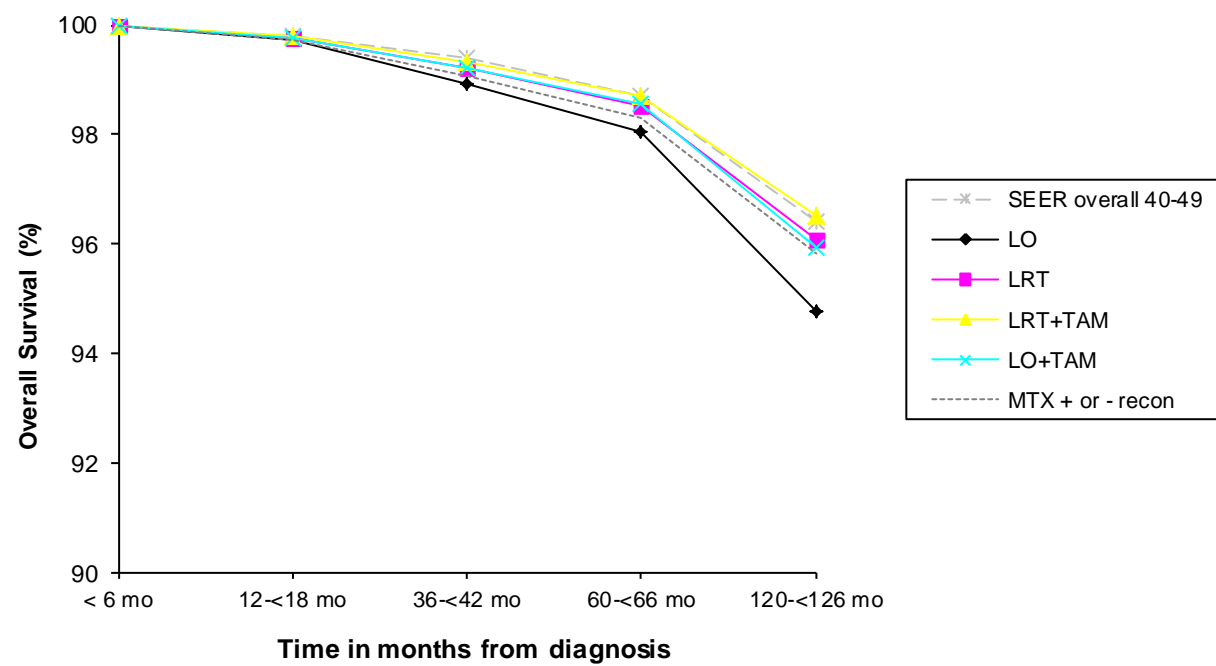

C.

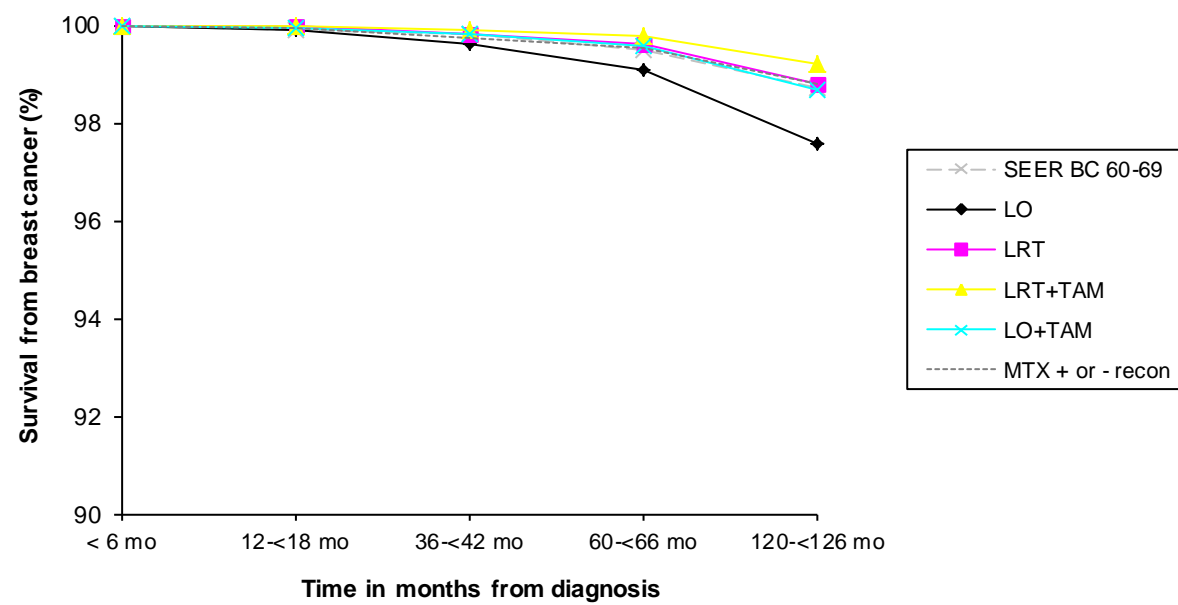

D.

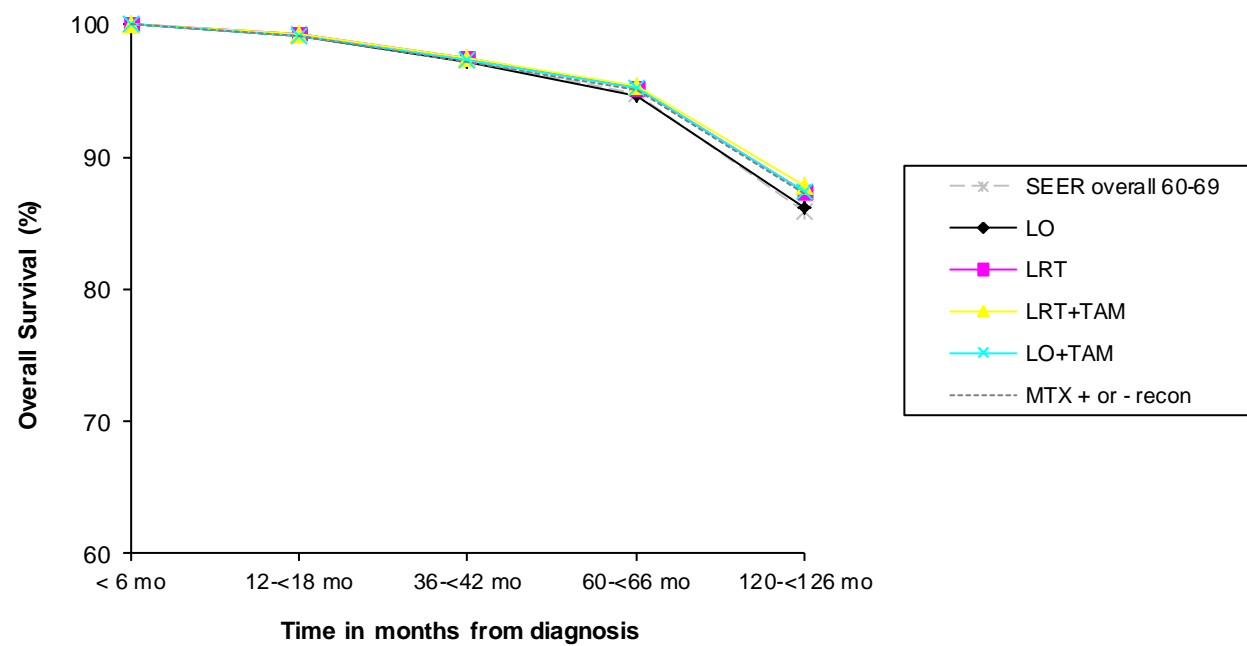

**E.**

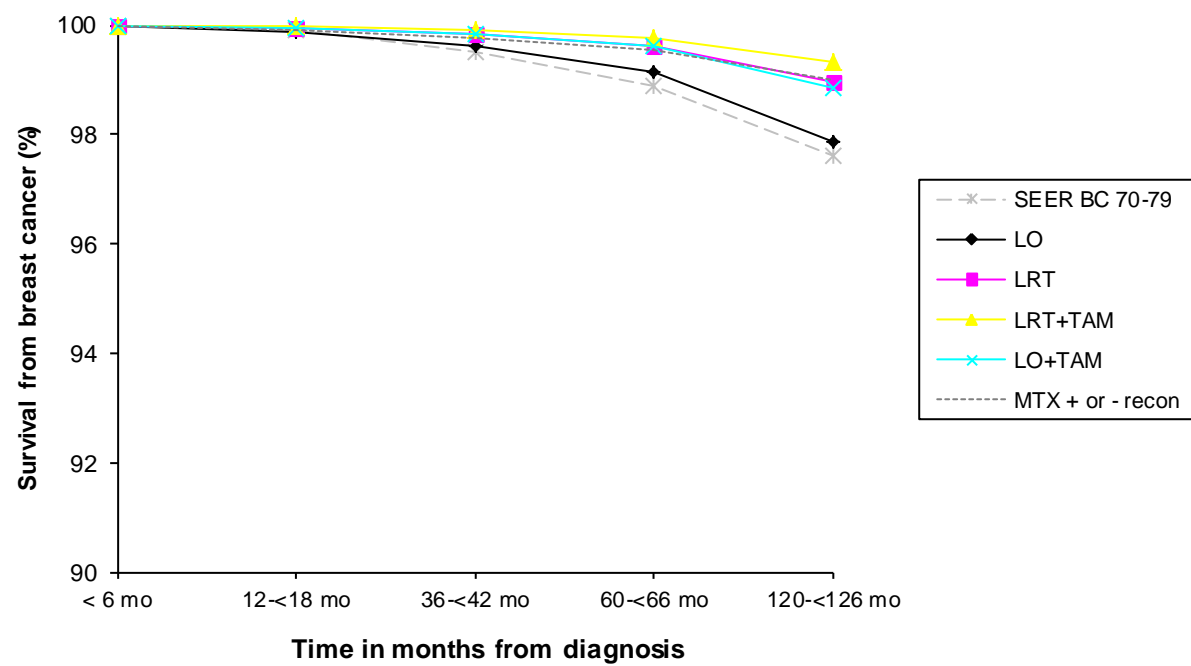

**F.**

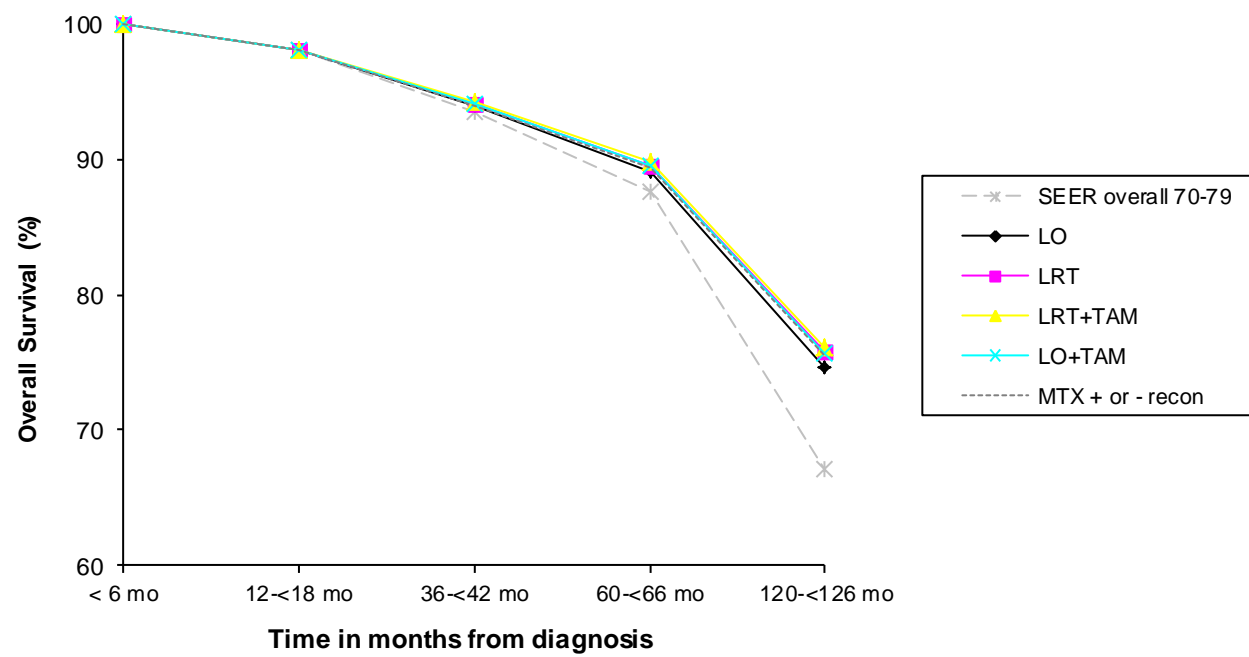

**Supplementary Table 1. Estimated survival in years for lumpectomy with and without radiation for selected ages at detection when using age-specific recurrence rates**

|                           | 45-year old woman |                       |         | 60-year old woman |                       |         | 70-year old woman |                       |         |
|---------------------------|-------------------|-----------------------|---------|-------------------|-----------------------|---------|-------------------|-----------------------|---------|
| Treatment choices         | Disease-free      | Invasive disease-free | Overall | Disease-free      | Invasive disease-free | Overall | Disease-free      | Invasive disease-free | Overall |
| Lumpectomy                | 24.0              | 29.0                  | 36.1    | 16.7              | 19.6                  | 23.5    | 12.1              | 14.0                  | 16.3    |
| Lumpectomy with radiation | 25.8              | 30.6                  | 36.4    | 19.6              | 21.4                  | 23.9    | 14.1              | 15.2                  | 16.6    |
